# Supplementary material for: A microRNA panel compared to environmental and polygenic scores for colorectal cancer risk prediction
Source: PubMed Central journal article supplement (PMC8355103; doi:10.1038/s41467-021-25067-8), 2021-08-10
Supplement: 41467_2021_25067_MOESM1_ESM.pdf [file 41467_2021_25067_MOESM1_ESM.pdf]

## Supplementary Information

### A microRNA panel compared to environmental and polygenic scores for colorectal cancer risk prediction

Raut et al.

**Supplementary Table 1. MicroRNAs significantly differentially expressed in the plasma of colorectal cancer patients compared to controls in the discovery set.**

|    | microRNA           | TMM Cases | TMM Controls | log <sub>2</sub> FC | P value <sup>#</sup> | Corrected P value <sup>§</sup> |
|----|--------------------|-----------|--------------|---------------------|----------------------|--------------------------------|
| 1  | <b>miR-370-3p</b>  | 90.43     | 229.24       | -1.57               | 8.36E-06             | 5.97E-03                       |
| 2  | <b>miR-409-3p</b>  | 482.34    | 1211         | -1.51               | 1.38E-05             | 5.97E-03                       |
| 3  | <b>miR-382-5p</b>  | 566.65    | 1432.08      | -1.41               | 1.96E-05             | 5.97E-03                       |
| 4  | <b>miR-432-5p</b>  | 717.11    | 1572.68      | -1.38               | 3.40E-05             | 7.75E-03                       |
| 5  | <b>miR-379-5p</b>  | 89.41     | 188.06       | -1.58               | 4.77E-05             | 8.70E-03                       |
| 6  | <b>miR-134-5p</b>  | 226.92    | 599.91       | -1.43               | 6.37E-05             | 9.68E-03                       |
| 7  | miR-16-5p          | 607674.17 | 305625.09    | 0.88                | 7.74E-05             | 1.01E-02                       |
| 8  | <b>miR-485-3p</b>  | 157.22    | 320.73       | -1.31               | 9.35E-05             | 1.07E-02                       |
| 9  | <b>miR-32-5p</b>   | 183.64    | 74.28        | 1.04                | 1.86E-04             | 1.54E-02                       |
| 10 | <b>miR-323b-3p</b> | 22.25     | 50.54        | -1.21               | 1.96E-04             | 1.54E-02                       |
| 11 | <b>miR-766-5p</b>  | 4.29      | 10.68        | -1.23               | 1.98E-04             | 1.54E-02                       |
| 12 | <b>let-7a-3p</b>   | 11.5      | 5.19         | 1.16                | 2.03E-04             | 1.54E-02                       |
| 13 | <b>miR-20b-5p</b>  | 563.54    | 220.09       | 1.09                | 2.39E-04             | 1.68E-02                       |
| 14 | <b>miR-337-5p</b>  | 8.52      | 18.15        | -1.08               | 2.91E-04             | 1.73E-02                       |
| 15 | miR-20a-5p         | 813.66    | 476.42       | 0.72                | 2.99E-04             | 1.73E-02                       |
| 16 | miR-7-5p           | 622.78    | 326.57       | 0.82                | 3.04E-04             | 1.73E-02                       |
| 17 | <b>miR-664b-5p</b> | 10.52     | 22.35        | -1.18               | 3.54E-04             | 1.81E-02                       |
| 18 | <b>miR-431-5p</b>  | 68.57     | 137.01       | -1.16               | 3.58E-04             | 1.81E-02                       |
| 19 | miR-19a-3p         | 285.23    | 141.48       | 0.82                | 4.16E-04             | 1.99E-02                       |
| 20 | miR-576-5p         | 72.75     | 36.86        | 0.88                | 5.49E-04             | 2.50E-02                       |
| 21 | miR-6750-5p        | 4.49      | 1.24         | 1.55                | 6.62E-04             | 2.78E-02                       |
| 22 | <b>miR-144-5p</b>  | 334.6     | 133.78       | 1.09                | 6.72E-04             | 2.78E-02                       |
| 23 | miR-106b-3p        | 530.78    | 289.81       | 0.72                | 7.32E-04             | 2.90E-02                       |
| 24 | <b>miR-3613-5p</b> | 152.88    | 69.83        | 1.06                | 7.90E-04             | 3.00E-02                       |
| 25 | miR-101-3p         | 7452.74   | 3389.57      | 0.94                | 8.75E-04             | 3.19E-02                       |
| 26 | miR-3614-5p        | 2.58      | 0.62         | 1.83                | 1.03E-03             | 3.63E-02                       |
| 27 | <b>miR-654-3p</b>  | 61.48     | 114.47       | -1.07               | 1.14E-03             | 3.70E-02                       |
| 28 | <b>miR-148b-5p</b> | 18.95     | 9.87         | 1.01                | 1.14E-03             | 3.70E-02                       |
| 29 | miR-363-3p         | 261.71    | 126.53       | 0.86                | 1.18E-03             | 3.70E-02                       |
| 30 | miR-182-5p         | 1222.67   | 590.83       | 0.90                | 1.23E-03             | 3.73E-02                       |
| 31 | miR-486-3p         | 135.46    | 69.59        | 0.90                | 1.29E-03             | 3.80E-02                       |
| 32 | <b>miR-485-5p</b>  | 24.97     | 56.57        | -1.23               | 1.44E-03             | 4.12E-02                       |
| 33 | miR-329-3p         | 3.09      | 7.46         | -1.23               | 1.61E-03             | 4.44E-02                       |
| 34 | miR-30e-5p         | 6820.84   | 4594.36      | 0.51                | 1.73E-03             | 4.65E-02                       |

<sup>#</sup> two-sided *P* value estimated by an exact test on the negative binomial distribution.

<sup>§</sup> Multiple testing correction by the method of Benjamini and Hochberg<sup>1</sup>

Note: MicroRNAs in bold were selected for further validation by quantitative real-time polymerase chain reaction.

Abbreviations: TMM, average trimmed mean of M (log expression ratio)-values/; FC, fold change between cases and controls.

**Supplementary Table 2. Sixty-four unique plasma or serum microRNAs for colorectal cancer detection identified by literature search and sorted by their performance.**

|    | microRNA                | Selected as single/ panel microRNA | AUC (95% CI) from validation rounds [References] | Other citations for individual microRNA |
|----|-------------------------|------------------------------------|--------------------------------------------------|-----------------------------------------|
| 1  | <b>miR-1246</b>         | Panel                              | 0.96 (0.94- 0.98) <sup>2</sup>                   |                                         |
| 2  | miR-202-3p <sup>a</sup> |                                    |                                                  |                                         |
| 3  | <b>miR-21-3p</b>        |                                    |                                                  |                                         |
| 4  | <b>miR-1229-3p</b>      |                                    |                                                  |                                         |
| 5  | <b>miR-532-3p</b>       |                                    |                                                  | 3                                       |
| 6  | miR-31-5p <sup>a</sup>  | Panel                              | 0.96 (0.87- 0.99) <sup>4</sup>                   | 5,6                                     |
| 7  | <b>miR-141-3p</b>       |                                    |                                                  | 6                                       |
| 8  | <b>miR-224-3p</b>       |                                    |                                                  |                                         |
| 9  | <b>miR-576-5p</b>       |                                    |                                                  |                                         |
| 10 | miR-4669 <sup>a</sup>   |                                    |                                                  |                                         |
| 11 | <b>miR-19a-3p</b>       | Panel                              | 0.95 (0.91- 0.98) <sup>7</sup>                   | 8,9                                     |
| 12 | <b>miR-223-3p</b>       |                                    |                                                  | 6                                       |
| 13 | <b>miR-92a-3p</b>       |                                    |                                                  | 5,6,10,11                               |
| 14 | miR-422a <sup>a</sup>   |                                    |                                                  |                                         |
| 15 | <b>miR-21-5p</b>        | Single                             | 0.93 (0.89- 0.96) <sup>12</sup>                  | 5,9,13-16                               |
| 16 | <b>let-7g-5p</b>        | Panel                              | 0.92 (0.87- 0.98) <sup>5</sup>                   |                                         |
| 17 | <b>miR-181b-5p</b>      |                                    |                                                  |                                         |
| 18 | <b>miR-203a-3p</b>      |                                    |                                                  |                                         |
| 19 | <b>miR-23a-3p</b>       | Panel                              | 0.92 <sup>17</sup>                               |                                         |
| 20 | <b>miR-142-5p</b>       |                                    |                                                  |                                         |
| 21 | <b>miR-27a-3p</b>       |                                    |                                                  |                                         |
| 22 | <b>miR-376c-3p</b>      |                                    |                                                  |                                         |
| 23 | miR-1290 <sup>a</sup>   | Panel                              | 0.91 (0.85- 0.96) <sup>18</sup>                  | 19                                      |
| 24 | miR-320d                |                                    |                                                  |                                         |
| 25 | miR-409-3p <sup>#</sup> | Panel                              | 0.90 (0.75- 0.95) <sup>20</sup>                  |                                         |
| 26 | <b>miR-7-5p</b>         |                                    |                                                  |                                         |
| 27 | <b>miR-93-5p</b>        |                                    |                                                  |                                         |
| 28 | miR-17-5p               | Panel                              | 0.90 (0.81- 0.98) <sup>21</sup>                  | 15                                      |
| 29 | miR-18a-5p              |                                    |                                                  | 6                                       |
| 30 | miR-103a-3p             |                                    |                                                  |                                         |
| 31 | miR-181a-5p             |                                    |                                                  |                                         |
| 32 | miR-127-3p              |                                    |                                                  |                                         |
| 33 | miR-18b-5p <sup>a</sup> |                                    |                                                  |                                         |
| 34 | miR-151a-5p             |                                    |                                                  |                                         |
| 35 | <b>miR-182-5p</b>       |                                    |                                                  | Single                                  |
| 36 | miR-29a-3p              | Panel with miR-92a-3p              | 0.88 (0.83- 0.94) <sup>11</sup>                  | 3                                       |
| 37 | miR-375-3p              | Panel                              | 0.85 (0.78- 0.92) <sup>23</sup>                  |                                         |
| 38 | miR-206                 |                                    |                                                  |                                         |

|    | <b>microRNA</b>         | <b>Selected as single/ panel microRNA</b> | <b>AUC (95% CI) from validation rounds [References]</b> | <b>Other citations for individual microRNA</b> |
|----|-------------------------|-------------------------------------------|---------------------------------------------------------|------------------------------------------------|
| 39 | miR-19b-3p              | Panel with miR-19a-3p                     | 0.84 (0.76- 0.92) <sup>8</sup>                          | 15                                             |
| 40 | miR-15b-5p              |                                           |                                                         |                                                |
| 41 | miR-20a-5p              | Panel with miR-182-5p                     | 0.83 (0.75- 0.91) <sup>22</sup>                         |                                                |
| 42 | miR-431-5p <sup>#</sup> | Panel                                     | 0.83 (0.73- 0.93) <sup>13</sup>                         |                                                |
| 43 | miR-139-3p              |                                           |                                                         |                                                |
| 44 | miR-425-5p              | Panel with miR-19a-3p & miR-21-5p         | 0.83 (0.71- 0.95) <sup>9</sup>                          |                                                |
| 45 | miR-378                 | Single                                    | 0.80 (0.68- 0.91) <sup>14</sup>                         |                                                |
| 46 | miR-221-3p              | Panel                                     | 0.79 <sup>6</sup>                                       |                                                |
| 47 | miR-191-5p              |                                           |                                                         |                                                |
| 48 | miR-24-3p               |                                           |                                                         |                                                |
| 49 | miR-760                 | Single                                    | 0.79 (0.71- 0.86) <sup>24</sup>                         |                                                |
| 50 | miR-601                 | Panel with miR-760                        | 0.79 (0.72- 0.87) <sup>24</sup>                         |                                                |
| 51 | miR-96-5p               | Single                                    | 0.74 (0.65- 0.83) <sup>25</sup>                         |                                                |
| 52 | miR-17-3p <sup>a</sup>  | Single                                    | 0.72 (0.63- 0.80) <sup>10</sup>                         |                                                |
| 53 | miR-26b-5p              | Single                                    | 0.71 (0.63- 0.79) <sup>15</sup>                         |                                                |
| 54 | miR-142-3p              | Single                                    | 0.71 <sup>26</sup>                                      |                                                |
| 55 | miR-145-5p              | Single                                    | 0.67 <sup>15</sup>                                      |                                                |
| 56 | miR-26a-5p              | Single                                    | 0.67 <sup>26</sup>                                      |                                                |
| 57 | miR-10b-5p              | Single                                    | 0.65 (0.58- 0.71) <sup>6</sup>                          |                                                |
| 58 | miR-25-3p               | Single                                    | 0.64 (0.58- 0.71) <sup>6</sup>                          |                                                |
| 59 | miR-133a-3p             | Single                                    | 0.63 <sup>3</sup>                                       |                                                |
| 60 | miR-497-5p              | Single                                    | 0.58 (0.51- 0.64) <sup>6</sup>                          |                                                |
| 61 | miR-106b-5p             | Single                                    | 0.57 <sup>3</sup>                                       |                                                |
| 62 | miR-204-5p <sup>a</sup> | Single                                    | 0.49 (0.34- 0.65) <sup>14</sup>                         |                                                |
| 63 | miR-135b-5p             | Single                                    | 0.48 (0.32- 0.64) <sup>14</sup>                         |                                                |
| 64 | miR-342-3p              | Single                                    | 0.44 <sup>3</sup>                                       |                                                |

<sup>a</sup> excluded as a potential literature miRNA candidate since it did not meet the criterion for expression level (TMM > 10 in at least one of the groups) in the next-generation sequencing (NGS) analysis

<sup>#</sup> already included as an NGS miRNA candidate

Note: miRNAs in bold were selected for quantitative real-time polymerase chain reaction profiling in the prospective set.

Abbreviations: miRNA, microRNA; AUC, area under the receiver-operating-characteristic curve; CI, confidence interval.

**Supplementary Table 3. Colorectal cancer risk prediction by microRNA risk score in the prospective set ( $N_{\text{case/control}} = 198/178$ ) with respect to time to diagnosis in cases.**

| <b>Population</b>                                | <b><math>N_{\text{case/control}}</math></b> | <b>AUC (95% CI)</b> | <b>Brier score</b> |
|--------------------------------------------------|---------------------------------------------|---------------------|--------------------|
| CRC cases diagnosed in $\leq 1$ yr vs. Controls  | 15/178                                      | 0.891 (0.803-0.978) | 0.167              |
| CRC cases diagnosed in $\leq 2$ yrs vs. Controls | 31/178                                      | 0.796 (0.696-0.895) | 0.173              |
| CRC cases diagnosed in $\leq 3$ yrs vs. Controls | 45/178                                      | 0.780 (0.693-0.867) | 0.176              |
| CRC cases diagnosed after 3yrs vs. Controls      | 153/178                                     | 0.816 (0.770-0.862) | 0.172              |

Abbreviations: CRC, colorectal cancer; AUC, area under the receiver-operating-characteristic curve; CI, confidence interval.

**Supplementary Table 4. Information on the quantitative real-time polymerase chain reaction primers (QIAGEN).**

|    | <b>microRNA</b> | <b>Accession</b> | <b>Catalog number</b> | <b>Sequence</b>          |
|----|-----------------|------------------|-----------------------|--------------------------|
| 1  | miR-370-3p      | MIMAT0000722     | YP00204011            | GCCUGCUGGGGUGGAACCUGGU   |
| 2  | miR-409-3p      | MIMAT0001639     | YP00204358            | GAAUGUUGCUCGGUGAACCCCU   |
| 3  | miR-382-5p      | MIMAT0000737     | YP00204169            | GAAGUUGUUCGUGGUGGAUUCG   |
| 4  | miR-432-5p      | MIMAT0002814     | YP00204776            | UCUUGGAGUAGGUCAUUGGGUGG  |
| 5  | miR-379-5p      | MIMAT0000733     | YP00205658            | UGGUAGACUAUGGAACGUAGG    |
| 6  | miR-134-5p      | MIMAT0000447     | YP00205989            | UGUGACUGGUUGACCAGAGGGG   |
| 7  | miR-485-3p      | MIMAT0002176     | YP00206055            | GUCAUACACGGCUCUCCUCUCU   |
| 8  | miR-485-5p      | MIMAT0002175     | YP02112548            | AGAGGCUGGCCGUGAUGAAUUC   |
| 9  | miR-32-5p       | MIMAT0000090     | YP00204792            | UAUUGCACAUUACUAAGUUGCA   |
| 10 | miR-323b-3p     | MIMAT0015050     | YP02100923            | CCCAAUACACGGUCGACCUCUU   |
| 11 | miR-766-5p      | MIMAT0022714     | YP02113546            | AGGAGGAAUUGGUGCUGGUCUU   |
| 12 | let-7a-3p       | MIMAT0004481     | YP00206084            | CUAUACAAUCUACUGUCUUUC    |
| 13 | miR-20b-5p      | MIMAT0001413     | YP00204755            | CAAAGUGCUCAUAGUGCAGGUAG  |
| 14 | miR-337-5p      | MIMAT0004695     | YP00204391            | GAACGGCUUCAUACAGGAGUU    |
| 15 | miR-664b-5p     | MIMAT0022271     | YP02109261            | UGGGCUAAGGGAGAUGAUUGGGUA |
| 16 | miR-431-5p      | MIMAT0001625     | YP00204737            | UGUCUUGCAGGCCGUCAUGCA    |
| 17 | miR-144-5p      | MIMAT0004600     | YP00204670            | GGUAUAUCAUCAUACUGUAAG    |
| 18 | miR-3613-5p     | MIMAT0017990     | YP02119046            | UGUUGUACUUUUUUUUUUUGUUC  |
| 19 | miR-654-3p      | MIMAT0004814     | YP00204054            | UAUGUCUGCUGACCAUCACCUU   |
| 20 | miR-148b-5p     | MIMAT0004699     | YP00204735            | AAGUUCUGUUAUACACUCAGGC   |
| 21 | miR-1246        | MIMAT0005898     | YP00205630            | AAUGGAUUUUUGGAGCAGG      |
| 22 | miR-21-3p       | MIMAT0004494     | YP00204302            | CAACACCAGUCGAUGGGCUGU    |
| 23 | miR-1229-3p     | MIMAT0005584     | YP00206036            | CUCUCACCACUGCCCUCCACAG   |
| 24 | miR-532-3p      | MIMAT0004780     | YP00204003            | CCUCCACACCCAAGGCUUGCA    |
| 25 | miR-141-3p      | MIMAT0000432     | YP00204504            | UAACACUGUCUGGUAAAGAUGG   |
| 26 | miR-224-3p      | MIMAT0009198     | YP00204629            | AAA AUGGUGCCCUAGUGACUACA |
| 27 | miR-576-5p      | MIMAT0003241     | YP00206064            | AUUCUAAUUUCUCCACGUCUUU   |
| 28 | miR-19a-3p      | MIMAT0000073     | YP00205862            | UGUGCAAUUCUAUGCAAACUGA   |
| 29 | miR-223-3p      | MIMAT0000280     | YP00205986            | UGUCAGUUUGUCAAAUACCCCA   |
| 30 | miR-92a-3p      | MIMAT0000092     | YP00204258            | UAUUGCACUUGUCCCGGCCUGU   |
| 31 | miR-21-5p       | MIMAT0000076     | YP00204230            | UAGCUUAUCAGACUGAUGUUGA   |
| 32 | let-7g-5p       | MIMAT0000414     | YP00204565            | UGAGGUAGUAGUUUGUACAGUU   |
| 33 | miR-181b-5p     | MIMAT0000257     | YP00204530            | AACAUUCAUUGCUGUCGGUGGGU  |
| 34 | miR-203a-3p     | MIMAT0000264     | YP00205914            | GUGAAAUGUUUAGGACCACUAG   |
| 35 | miR-23a-3p      | MIMAT0000078     | YP00204772            | AUCACAUUGCCAGGGAUUUC     |
| 36 | miR-142-5p      | MIMAT0000433     | YP00204722            | CAUAAAGUAGAAAGCACUACU    |
| 37 | miR-27a-3p      | MIMAT0000084     | YP00206038            | UUCACAGUGGCUAAGUCCGC     |
| 38 | miR-376c-3p     | MIMAT0000720     | YP00204442            | AACAUAGAGGAAAUUCCACGU    |
| 39 | miR-7-5p        | MIMAT0000252     | YP00205877            | UGGAAGACUAGUGAUUUUGUUGU  |
| 40 | miR-93-5p       | MIMAT0000093     | YP00204715            | CAAAGUGCUGUUCGUGCAGGUAG  |
| 41 | miR-182-5p      | MIMAT0000259     | YP00206070            | UUUGGCAAUGGUAGAACUCACACU |

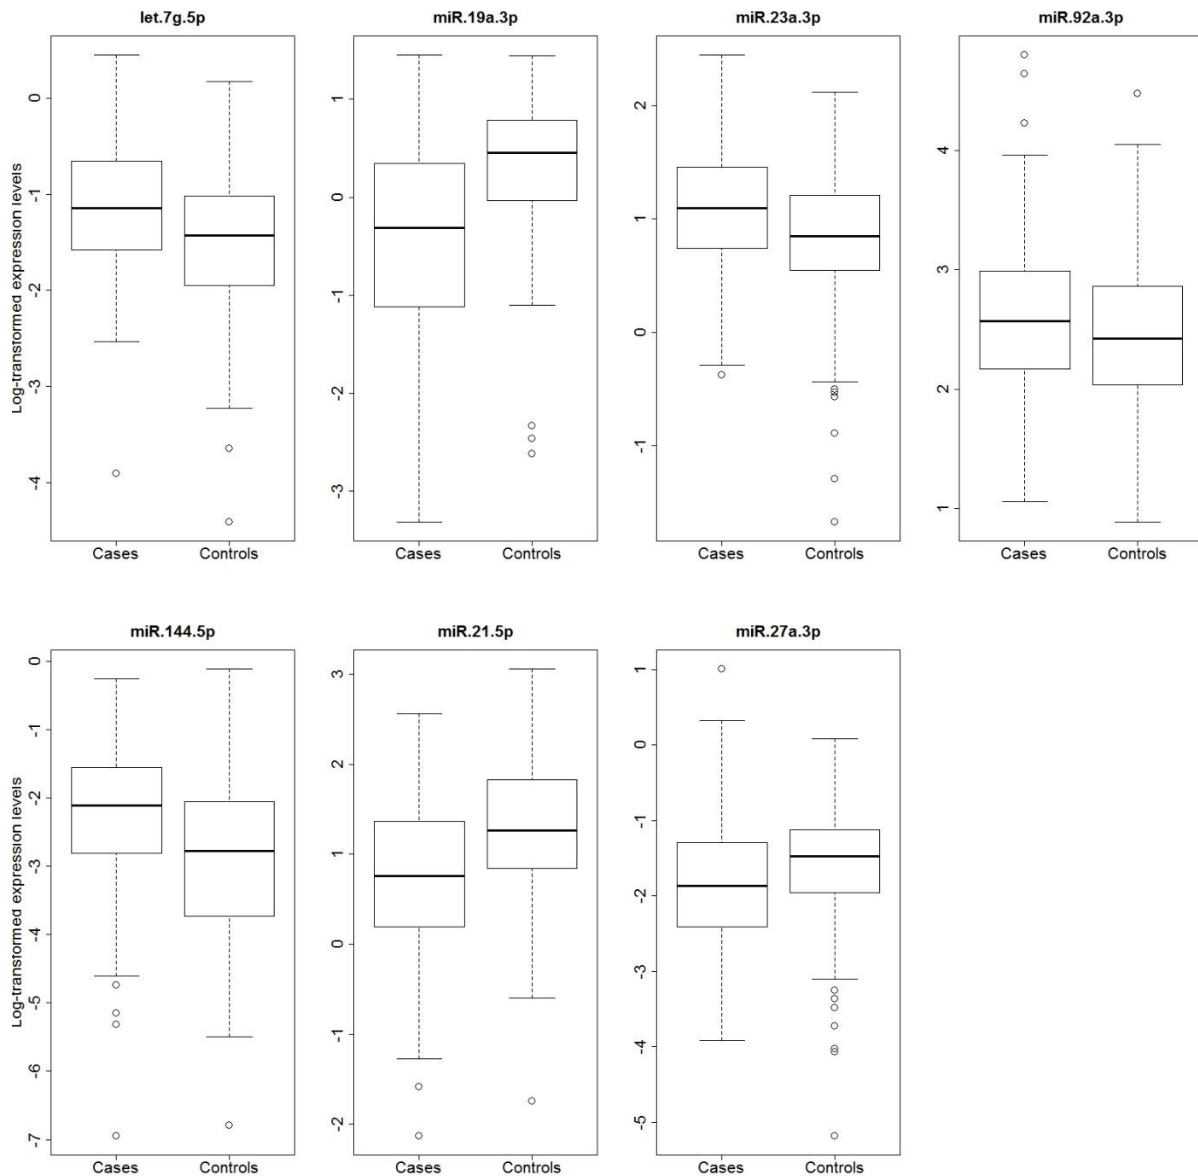

**Supplementary Fig. 1. Box-plots showing serum miRNA expression levels in the prospective set ( $N_{\text{case/control}} = 198/178$ ) determined by quantitative real-time polymerase chain reaction.** Expression levels of miRNAs are normalized to the average Cq value of miR-93-5p, miR-1246 and miR-223-3p and are represented as log-transformed ( $-\Delta\text{Cq}$ ) values. The lines inside the boxes denote the medians. The boxes mark the interval between the 25th and 75th percentiles. The whiskers extend to the observations which are no more than 1.5 times the length of the box (interquartile range) away from the box. More extreme observations are considered outliers and are indicated as single circle symbols.

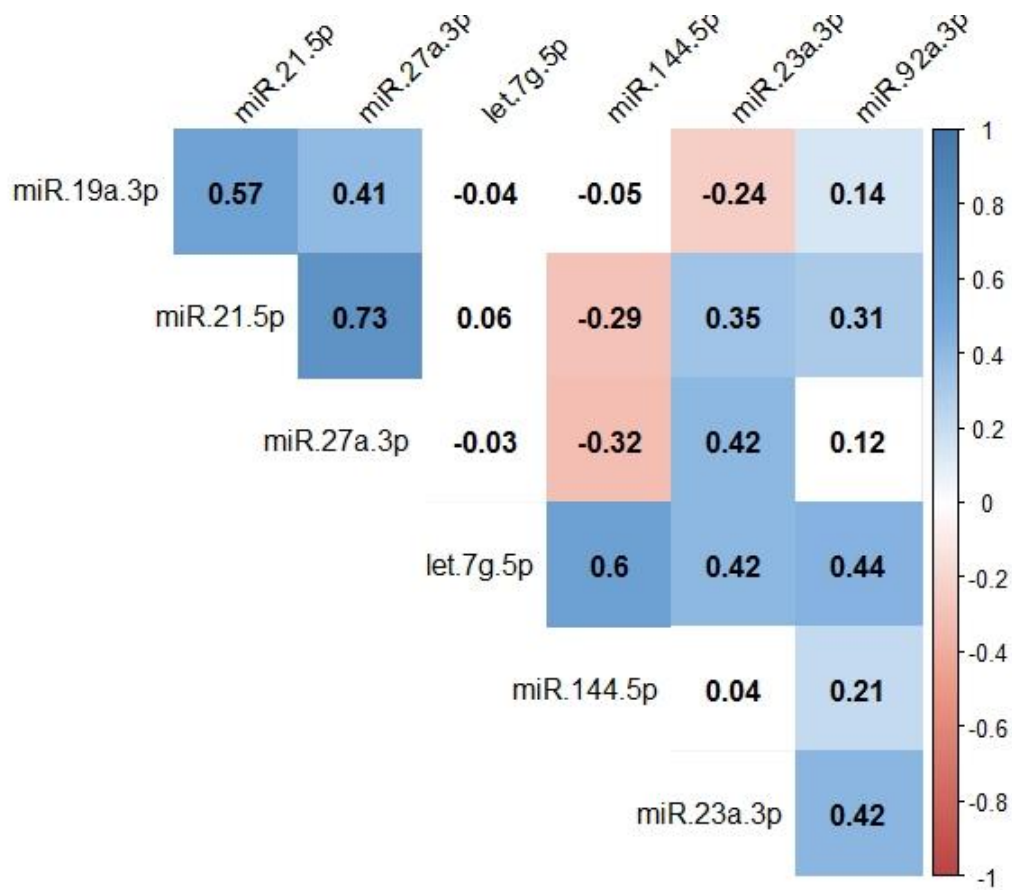

**Supplementary Fig. 2. Spearman's correlation coefficients of microRNA expression levels in the prospective set ( $N_{\text{case/control}} = 198/178$ ) ( $p < 0.05$  if not blank).**



## Supplementary Note 1. PubMed search terms.

[(colorectal OR colon OR colonic OR rectal OR rectum)) AND (cancer OR carcinoma OR adenoma OR neoplasm OR tumor OR malignancy) AND (plasma OR serum OR sera) AND (microRNA OR micro-RNA OR "microRNA" OR miRNA OR mi-RNA OR miR OR let-7) AND (predict OR detect OR diagnose OR diagnosis OR screen OR marker OR biomarker) AND ("receiver operating characteristic" OR ROC OR AUC) AND (valid\*)].

## Supplementary References

- 1 Benjamini, Y. & Hochberg, Y. Controlling the false discovery rate: a practical and powerful approach to multiple testing. *J. R. Stat. Soc. Ser. B (Methodol.)* **57**, 289-300 (1995).
- 2 Guo, S. *et al.* A 5-serum miRNA panel for the early detection of colorectal cancer. *Oncotargets Ther.* **11**, 2603-2614 (2018).
- 3 Luo, X., Stock, C., Burwinkel, B. & Brenner, H. Identification and evaluation of plasma microRNAs for early detection of colorectal cancer. *PLoS One* **8**, e62880 (2013).
- 4 Wang, Y. N., Chen, Z. H. & Chen, W. C. Novel circulating microRNAs expression profile in colon cancer: a pilot study. *Eur. J. Med. Res.* **22**, 51 (2017).
- 5 Wang, J. *et al.* Identification of a circulating microRNA signature for colorectal cancer detection. *PLoS One* **9**, e87451 (2014).
- 6 Chang, P. Y. *et al.* MicroRNA-223 and microRNA-92a in stool and plasma samples act as complementary biomarkers to increase colorectal cancer detection. *Oncotarget* **7**, 10663-10675 (2016).
- 7 Zheng, G. *et al.* Serum microRNA panel as biomarkers for early diagnosis of colorectal adenocarcinoma. *Br. J. Cancer* **111**, 1985-1992 (2014).
- 8 Giraldez, M. D. *et al.* Circulating microRNAs as biomarkers of colorectal cancer: results from a genome-wide profiling and validation study. *Clin. Gastroenterol. Hepatol.* **11**, 681-688 (2013).
- 9 Zhu, M. *et al.* A panel of microRNA signature in serum for colorectal cancer diagnosis. *Oncotarget* **8**, 17081-17091 (2017).
- 10 Ng, E. K. *et al.* Differential expression of microRNAs in plasma of patients with colorectal cancer: a potential marker for colorectal cancer screening. *Gut* **58**, 1375-1381 (2009).
- 11 Huang, Z. *et al.* Plasma microRNAs are promising novel biomarkers for early detection of colorectal cancer. *Int. J. Cancer* **127**, 118-126 (2010).
- 12 Toiyama, Y. *et al.* Serum miR-21 as a diagnostic and prognostic biomarker in colorectal cancer. *J. Natl. Cancer Inst.* **105**, 849-859 (2013).
- 13 Kanaan, Z. *et al.* Plasma miR-21: a potential diagnostic marker of colorectal cancer. *Ann. Surg.* **256**, 544-551 (2012).
- 14 Zanutto, S. *et al.* Circulating miR-378 in plasma: a reliable, haemolysis-independent biomarker for colorectal cancer. *Br. J. Cancer* **110**, 1001-1007 (2014).
- 15 Pan, C. *et al.* Systematic literature review and clinical validation of circulating microRNAs as diagnostic biomarkers for colorectal cancer. *Oncotarget* **8**, 68317-68328 (2017).
- 16 Wikberg, M. L., Myte, R., Palmqvist, R., van Guelpen, B. & Ljuslinder, I. Plasma miRNA can detect colorectal cancer, but how early? *Cancer Med.* **7**, 1697-1705 (2018).
- 17 Vychytilova-Faltejskova, P. *et al.* Serum-based microRNA signatures in early diagnosis and prognosis prediction of colon cancer. *Carcinogenesis* **37**, 941-950 (2016).
- 18 Liu, X. *et al.* Circulating miR-1290 and miR-320d as Novel Diagnostic Biomarkers of Human Colorectal Cancer. *J. Cancer* **10**, 43-50 (2019).
- 19 Imaoka, H. *et al.* Circulating microRNA-1290 as a novel diagnostic and prognostic biomarker in human colorectal cancer. *Ann. Oncol.* **27**, 1879-1886 (2016).

- 20 Wang, S. *et al.* A plasma microRNA panel for early detection of colorectal cancer. *Int. J. Cancer* **136**, 152-161 (2015).
- 21 Zhang, H. *et al.* A panel of seven-miRNA signature in plasma as potential biomarker for colorectal cancer diagnosis. *Gene* **687**, 246-254 (2018).
- 22 Liu, X. *et al.* Elevated circulating miR-182 acts as a diagnostic biomarker for early colorectal cancer. *Cancer Manag. Res.* **10**, 857-865 (2018).
- 23 Xu, L. *et al.* The expression of microRNA-375 in plasma and tissue is matched in human colorectal cancer. *BMC Cancer* **14**, 714 (2014).
- 24 Wang, Q. *et al.* Plasma miR-601 and miR-760 are novel biomarkers for the early detection of colorectal cancer. *PLoS One* **7**, e44398 (2012).
- 25 Sun, Y. *et al.* Examining plasma microRNA markers for colorectal cancer at different stages. *Oncotarget* **7**, 11434-11449 (2016).
- 26 Ghanbari, R. *et al.* Downregulation of Plasma MiR-142-3p and MiR-26a-5p in Patients With Colorectal Carcinoma. *Iranian journal of cancer prevention* **8**, e2329 (2015).
